# Supplementary material
Source: Frontiers journal article supplement (https://www.frontiersin.org/articles/536916)
Supplement: Data_Sheet_6.DOCX [file Data_Sheet_6.DOCX]

**Supplementary Material**

**1 Supplementary text**

**1.1. Code of “rbacon” for age-depth modelling**

library("rbacon")

setwd("~/R/bacon_run")

Bacon(core = "shanggan_ssb", thick = 20, coredir = ".", prob = 0.95,

d.min = NA, d.max = 2000, d.by = 1, depths.file = FALSE, depths = c(),

unit = "cm", acc.shape = 1.5, acc.mean = c(0.40, 0.8), mem.strength = 1.5,

mem.mean = 0.2, boundary = NA, hiatus.depths = 780, hiatus.max = 500000,

add = 0, after = 1e-04, cc = 1, cc1 = "IntCal13", cc2 = "Marine13",

cc3 = "SHCal13", cc4 = "ConstCal", ccdir = "", postbomb = 0,

delta.R = 0, delta.STD = 0, t.a = 23, t.b = 24, normal = TRUE,

suggest = TRUE, reswarn = c(10, 200), remember = TRUE, ask = TRUE,

run = TRUE, defaults = "default_settings.txt", sep = ",", dec = ".",

runname = "", slump = c(), BCAD = FALSE, th0 = c(),

burnin = min(200, 2000), MinYr = c(), MaxYr = c(), cutoff = 0.001,

plot.pdf = TRUE, dark = 1, date.res = 100, yr.res = 200)

Bacon(core = "qiakong", thick = 10, coredir = ".", prob = 0.95,

d.min = NA, d.max = 2520, d.by = 1, depths.file = FALSE, depths = c(),

unit = "cm", acc.shape = 1.5, acc.mean = c(1.6, 0.24, 0.8), mem.strength = 1.5,

mem.mean = 0.2, boundary = , hiatus.depths = c(40, 1410), hiatus.max = 500000,

add = 0, after = 1e-04, cc = 1, cc1 = "IntCal13", cc2 = "Marine13",

cc3 = "SHCal13", cc4 = "ConstCal", ccdir = "", postbomb = 0,

delta.R = 0, delta.STD = 0, t.a = 63, t.b = 64, normal = TRUE,

suggest = TRUE, reswarn = c(10, 200), remember = TRUE, ask = TRUE,

run = TRUE, defaults = "default_settings.txt", sep = ",", dec = ".",

runname = "", slump = c(), BCAD = FALSE, th0 = c(),

burnin = min(200, 2000), MinYr = c(), MaxYr = c(), cutoff = 0.001,

plot.pdf = TRUE, dark = 1, date.res = 100, yr.res = 200)

Bacon(core = "laren", thick = 10, coredir = ".", prob = 0.95,

d.min = NA, d.max = NA, d.by = 1, depths.file = FALSE, depths = c(),

unit = "cm", acc.shape = 1.5, acc.mean = c(0.40, 1), mem.strength = 1.5,

mem.mean = 0.2, boundary = NA, hiatus.depths = 775, hiatus.max = 500000,

add = 0, after = 1e-04, cc = 1, cc1 = "IntCal13", cc2 = "Marine13",

cc3 = "SHCal13", cc4 = "ConstCal", ccdir = "", postbomb = 0,

delta.R = 0, delta.STD = 0, t.a = 23, t.b = 24, normal = TRUE,

suggest = TRUE, reswarn = c(10, 200), remember = TRUE, ask = TRUE,

run = TRUE, defaults = "default_settings.txt", sep = ",", dec = ".",

runname = "", slump = c(), BCAD = FALSE, th0 = c(),

burnin = min(200, 2000), MinYr = c(), MaxYr = c(), cutoff = 0.001,

plot.pdf = TRUE, dark = 1, date.res = 100, yr.res = 200)

**1.2. Detailed discussion of the biochronology**

*Ammonoid biostratigraphic age control:*
Tozer (1967) first defined the Smithian and the Spathian stages based on the ammonoid record from the Sverdrup Basin, with complementary data from NE British Columbia. The empirical maximal concurrent range zones constructed by Tozer (1967) are discontinuous and include an interval of separation between two consecutive zones. In the low latitude record of North America, Silberling and Tozer (1968) placed the SSB between the *Anasibirites* beds and the *Tirolites*/*Columbites* beds. In the high latitude record of North America, the same authors placed the SSB boundary between the *Wasatchites tardus* Zone and the *Olenekites pilaticus* Zone. In the high latitude record from Siberia, Dagys (1994) placed the SSB between the *W. tardus* Zone and the *Bajarunia euomphala* Zone. As first noticed by Tozer (1982), the late Smithian *W. tardus* Zone has a remarkable cosmopolitan distribution. The boreal *W. tardus* Zone has a perfect correlative in the tropical record, namely the *Anasibirites multiformis* Zone, which also includes *W. tardus*. The *Anasibirites multiformis* Zone and its correlatives recorded the overwhelming predominance of Prionitidae both in terms of taxonomic diversity and relative abundanc. This family originated during the middle Smithian but all its late Smithian representatives (*Anasibirites*, *Wasatchites*, *Hemiprionites*, *Arctoprionites*) were newly evolved. In the northern Indian margin record, the *A. multiformis* Zone is distinctly followed by the *Glyptophiceras sinuatum* Zone (Brühwiler et al. 2010), which is also of late Smithian affinity. The same zone was recently recorded from the Thaynes Fm. (Jenks and Brayard 2018), thus bestowing this zone afull tropical, trans-panthalassic distribution. This zone is characterized by a narrow bottleneck in taxonomic diversity, with only a few representatives (*Glyptophiceras*, *Xenoceltites*) of Xenoceltiditae. Prior to Brühwiler et al. (2010), the *A. multiformis* Zone was treated as an equivalent of the entire late Smithian (e.g. Brayard & Bucher 2006). The scope of this zone was then shortened with the introduction of a second late Smithian zone, namely the *G. sinuatum* Zone of Brühwiler et al. (2010). To this date, the *G. sinuatum* Zone has no known correlative in the boreal record, where the early Spathian *B. euomphala* Zone unconformably rests on the *W. tardus* Zone, without intervening rocks (Hammer et al. 2019). The perfect correlation between the boreal *W. tardus* Zone and the tropical *A. multiformis Zone,* the general absence of boreal correlatives of the *G. sinuatum* Zone and the unconformable boreal succession all point to an earlier onset of the SSB gap in the boreal record than in the tropical record.

Because the respective position of the boreal oldest Spathian *O. pilaticus* and *B. euomphala* zones remain unclear, the first Spathian zone was better defined by the *Tirolites*/*Columbites* beds of the tropical record, where it consistently occurs above the upper limit of the *G. sinuatum* Zone. A new intervening fauna characterized by Tirolitidae n. gen. A was first reported by Galfetti et al. (2007) from the base of the nodular limestone in the Luolou Fm. This new fauna has a clear Spathian affinity and invariably occurs above the *G. sinuatum* Zone and below the *Tirolites*/*Columbites* beds in the Loulou Fm. Consequently, in South China the SSB falls within the interval of separation bounded by the late Smithian *G. sinuatum* Zone below and the early Spathian Tirolitidae n. gen. A beds above. The same Tirolitidae n. gen. A fauna has also been recently recovered from the Union Wash Fm. in California and from the Thaynes Fm. in Nevada (H. Bucher ongoing work), therefore allowing a narrower, robust and consistent placement of the SSB in the succession of ammonoid faunas on both sides of Panthalassa. Exceptional sections in NE Nevada where the latest Smithian global regression was outstripped by local tectonic subsidence yield an additional and third late Smithian zone intercalated between the *G. sinuatum* Zone and the Tirolitidae n. gen. A beds (H. Bucher ongoing work). This latest Smithian zone is characterized by transition forms between the late Smithian genus *Xenoceltites* and the early Spathian genera *Bajarunia*, Tirolitidae n. gen. A. and *Columbites*, but typically lacks Tirolitidae. Hence, the base of the Spathian is best defined by the remarkable radiation of tirolitids and columbitids, which both root into the late Smithian xenoceliitid stock. This definition narrows down, improves, and is compatible with the initial definition of Tozer (1967) and Silberling and Tozer (1968). The initial interval of separation that contained the SSB in its original definition is drastically shortened by the intercalation of three new zones, two in late Smithian and one at the base of Spathian. The present definition of the SSB reflects a natural boundary (Lucas 2019) with an extinction-diversification cycle of ammonoids as a response to global environmental changes (e.g. climate cooling followed by a glacio-eustatic regression) and corresponds to a sequence boundary as advocated by Miller and Wright (2017).

Because most if not all ammonoid faunas or beds or maximal associations from the equatorial Nanpanjiang Basin have correlatives in the western USA basin, these beds can be elevated at the zonal rank with a trans-Panthalassic biogeographic significance. Therefore, we use the following scheme and abbreviations in the main text and in the SM: Early Smithian: *Flemingites* Zone (FZ); Middle Smithian: *Owenites koeneni* Zone (OZ); Late Smithian: *Anasibirites multiformis-Wasatchites tardus* Zone (AWZ), *Glyptophiceras sinnuatum-Xenoceltites* *pauciradiatus* Zone (GXZ), new zone (NZ); early Spathian: Tirolitae n. gen. A (TAZ), *Tirolites-Columbites* Zone (TCZ) and middle Spathian: *Procolumbites* Zone (PZ.)

*Conodont age control, intercalibration with ammonoid zones and position of the SSB:* A new conodont dataset based on four SSB sections (Qiakong, Shanggang, Laren and Lilong, Fig. 1 and Fig. S1) was processed by means of Unitary Associations (UA) (Guex 1991, software UA Graph in Hammer 2013). Taxonomy and its consequences for biochronological zones are dealt with in detail in a separate monograph (Leu et al., ongoing work). The ranges of taxa for which names are already available in the literature are shown in Figure S2. New taxa involved in the construction of UA zones are here provisionally left in open nomenclature and are fully described in the forthcoming monograph. Species composition of the seven obtained conodont UAZs is given in Fig. S3.

UAZ1 is of Early Smithian age and has a single characteristic species (*Neospathodus* aff. *cristagalli*). This UAZ occurs in Unit III in Laren and Unit III and the beginning of Unit IVa in Shanggang. UAZ1 overlaps with the negative CIE and coincides with the early Smithian ammonoid FZ.

Characteristic single species of UAZ2 are *Conservatella spp., Neospathodus* n. sp. V and *Guangxidella bransoni*. UAZ2 is of middle Smithian age and occurs in unit IVa in Laren and Shanggang, where it is associated with the OZ. In Qiakong, UAZ2 has not been documented but should potentially occur below UAZ3, well within the Daye Fm., which represents slope deposits with a poor conodont record.

*Discretella* n. sp. A is the characteristic species of UAZ3. This UA zone is documented at the top of the OZ in unit IVa in Laren. In Qiakong, UAZ3 is found ca. 2m below the top of the Daye Fm. In Shanggang, there is ample room for UAZ3 at the top of Unit IVa, between UAZ2 and UAZ4.

The characteristic species of UAZ4 are *Hadrodontina aequabilis* and *Ha*. aff. *aequabilis.* UAZ4 has excellent lateral reproducibility and occurs in all four sections.UAZ4 concurs with the AWZ as documented in Laren and Shanggang. UAZ4 occurs in the lower part (Shanggang, Qiakong) and in the middle part (Laren) of Unit IVb.

The characteristic pairs of species of UAZ5 are *Nv.* n. sp. A with *Nv.* n. sp. B or *Nv.* aff. *pingdingshanensis* or *Nv.* *pingdingshanensis* or *Nv*. ex. gr. *abruptus* or *Nv*. n. sp. C or *Ic. zaksi* or *Tr*. aff. *symmetricus*. UAZ5 occurs in Qiakong, Shanggang and Lilong. In Laren, UAZ5 is not identified, but there is room for it between UAZ4 and UAZ6. UAZ5 is within unit IVb and within the positive CIE in all studied sections. The late Smithian GXZ is also included within UAZ5 in Lilong.

UAZ6 contains seven pairs of characteristic species, each of which being defined by the overlap of species having their last occurrence (LO) and their first occurrence (FO) in this UAZ (with the except of *Nv*. ex. gr. *abruptus*). UAZ6 consistently occurs in the upper part of unit IVb but was not recovered from Shanggang because the top of Unit IVb has been removed by a low angle fault. In Lilong, this UA zone occurs in the uppermost part of the black shale unit IVb, whereas in Qiakong it is documented at the base of unit Va. This apparent diachronism may result from the variable amplitude of the gap between units IVb and Va. In Qiakong and Lilong, the SSB is placed within the interval of separation bounded by UAZ5 and UAZ6. In Laren, the SSB is located anywhere within the interval bracketed by UZA5 and UAZ7. In Shanggang, low angle faulting has crushed rocks containing the SSB. The positioning of the SSB with respect to conodont-based UAZs rests; a) on the laterally reproducible inter-calibration between the late Smithian ammonoid GXZand conodont UAZ6; b) the partial overlap of UAZ6 with the early Spathian TAZ. In Lilong, UAZ6 rests directly above an ammonoid-bearing bed (Yu22 of Brayard and Bucher 2008), whose faunal content is not enough well preserved for unambiguous identifications and age assignment but which is clearly distinct from NZ. However, the position of UAZ6 in Lilong demonstrates that the SSB is ca. 20 cm below the sharp lithological boundary between units IVb and Va. Both ammonoid concurrent range zones and conodont Unitary Associations allow the unambiguous placement of the SSB. This definition avoids the inherent contradictions of a diachronous base Spathian as tentatively proposed with the FO of *Nv*. *pindingshanensi* by some conodont workers.

The distinct characteristic species of UAZ7 includes *Nv*. *brochus* or the pair of species *Ic*. aff. *crassatus* or *Tr*. *symmetricus* or *Nv*. *brevissimus* with *Tr*. *homeri* or *Ad*. *unicosta* or *Ic*. *collinsoni*, *Ng*. n. sp. A. This UA zone can be reproduced in all studied sections and is of early Spathian age. In Qiakong, Laren and Lilong, UAZ7 has its base within the upper part of Unit Va. In Qiakong, UAZ7 ranges into the base of unit Vc. In Lilong, UAZ7 is intersects with the top of the TAZ.

The single characteristic species of UAZ8 is *Spathicuspus* n. sp. B. UAZ8 occurs in Laren and Shanggang and overlaps the TCZ and ash layer CHIN10.

The SSB boundary crosser *Nv. pindingshanensis* forms the rootstock of the early Spathian major evolutionary radiation of segminate conodonts such as *Novispathodus*, *Triassospathodus* and *Icriospathodus*.

*The first occurrence of Novispathodus pindingshanensis is not a reliable base-Spathian index:*Laishi et al. (2007) proposed a definition of the base of the Spathian utilizing the first occurrence (FO) of *Nv. pindingshanensis* which is incompatible with the original ammonoid definition of Tozer (1967) and Silberling and Tozer (1968). The definition of Laishi et al. (2007) has been subsequently endorsed and uncritically applied by a majority of conodont workers. The Majiashan section in Chaohu studied by Laishi et al. (2007) shows that *Nv. pindingshanensis* overlaps with the Spathian TCZ, but its FO is placed way below these beds and above the AWZ. The meager ammonoid record of Chaohu does not yield a correlative of the late Smithian GXZ, with which the lower part of the range of *Nv. pindingshanensis* overlaps in many sections (see Fig. S2). Moreover, in Chaohu, the reported co-occurrence of the exclusively late Smithian genus *Anasibirites* with the distinctive middle Smithian genera *Euflemingites and Dieneroceras*, *Juvenites, Arctoceras, Owenites, Preflorianites* and with the characteristic Spathian *Dagnoceras* casts some serious doubt on these identifications from Chaohu. The same remarks apply to the occurrence of the exclusively Smithian *Juvenites* and *Xenoceltites* within the Spathian *Tirolites*/*Columbites* beds. Surprisingly, Laishi et al. (2007) also correlates their new base Spathian *Nv. pindingshanensis* interval zone with the Smithian *milleri* interval zone of Spiti and Primorye. The reported co-occurrence of the exclusively Spathian *Aduncodina unicosta* with *Ns. spitiensis* of typical Smithian age is another internal contradiction of the conodont record of West Pingdingshan (Chaohu). The use of interval zones whose bases are defined by the FO of an index species inevitably leads to diachronous and contradictory correlations. This problem is well illustrated by the co-occurrence of *Nv. pingdingshanensis* with characteristic Spathian taxa (e.g. *Tr. homeri*) in North Pingdingshan and by the occurrence of the same index species below all typical Spathian conodont taxa in West Pingdingshan and South Majiashan. Such inconsistencies and contradictions in the definition of this *Nv. pingdingshanensis* interval zone have resulted in major age confusion in many subsequent studies relying on the FO of this index species. Orchard and Zonneveld (2009), Goudemand et al. (2012), Romano et al. (2013), Komatsu et al. (2016) and Leu et al. (2019) documented that *Nv. pindingshanensis* is either restricted to strata of Smithian age or crosses the SSB and ranges into the early Spathian, thus invalidating the definition proposed by Laishi et al. (2007). In Qiakong, Laren and Lilong, this alleged base Spathian index occurs in strata of undoubted Smithian age as indicated by conodonts, ammonoids or both.

*Previous work on SSB conodont quantitative biostratigraphy in South China:*Utilizing the unitary association method, Chen et al. (2019) recently published a conodont biostratigraphy around the SSB from based on four sections throughout the Tethys region (two in Oman, one in Slovenia and one in South China). In their study, 7 UAZs were recognized and the SSB was placed between their UAZ4 and UAZ5 (note that their UAZ numbering is independent from ours). Noteworthy, *Nv*. *pingdingshanensis* is a single characteristic species of the latest Smithian UAZ4 of Chen et al. (2019). In this recent contribution, the first Spathian UAZ5 and UAZ6 could not be identified in their south Chinese section (Jiarong, Guizhou Province). Beside *Nv. pingdingshanensis*, distinct characteristic species of the latest Smithian UAZ4 include *Borinella* aff. *buurensis* (not illustrated), *Ns. planus* and *Ns. robustus*, which are only recorded from Slovenia. Furthermore, the distinct characteristic species from their first Spathian UAZ5 (*Pl. corniger* and *Pl. regularis*) are also only documented from Slovenia. Other characteristic species present in UAZ4 and/or UAZ5 are either geographically restricted to Oman and European sections (e.g. *Foliella gardenae*) or are at variance with our own taxonomic definitions. For example, lumping of all recovered specimens assigned to the genus *Neogondolella* in only three species (*Ng*. ex. gr. *jakutensis*, *Ng*. sp. A and *Ng*. sp. B) diverges from our own species concept. Last but not least, a major contradiction is found with the occurrence of the typically Spathian ammonoids *Columbites* sp. and *Deweveria* sp. within the *Nv. pingdingshanensis* interval zone in Jiarong (Chen et al. 2015) and within the positive CIE which is of late Smithian age. For these reasons among many others, at this stage we prefer our more complete and higher resolution conodont biochronology based on four sections from the same basin and intercalibrated with ammonoid zones rather than a very heterogenous mixture of data from widely separated basins and biogeographic domains with inadequate ammonoid intercalibration as proposed by Chen et al. (2019). Identification of our own UAZs in Jiarong will be addressed in a forthcoming study (Leu et al., ongoing work).

An illustration of the consequences of these muddled correlations generated by the FO of conodont index species is provided by Goudemand et al. (2013). These authors showed that the thermal maximum is not late Smithian (Sun et al. 2012) but middle Smithian in age, which is of paramount importance for a sound interpretation of the newly calibrated late Smithian to early Spathian global changes.

**1.3. References**

Brayard, A., Bucher, H., 2008. Smithian (Early Triassic) ammonoid faunas from northwestern Guangxi (South China): *Taxonomy and Biochronology*. Fossils and Strata 55, 179 pp.

Brayard, A., Bucher, H., Escarguel, G., Fluteau, F., Bourquin, S., Galfetti, T., 2006. The Early Triassic ammonoid recovery: Paleoclimatic significance of diversity gradients. *Palaeogeography, Palaeoclimatology, Palaeoecology*. 239, 374–395. https://doi.org/10.1016/j.palaeo.2006.02.003

Brühwiler, T., Bucher, H., Brayard, A. & Goudemand, N., 2010. High-resolution biochronology and diversity dynamics of the Early Triassic ammonoid recovery: the Smithian faunas of the Northern Indian Margin. *Palaeogeography, Palaeoclimatology, Palaeoecology*, 297: 491-501.

Chen, Y., Jiang, H., Lai, X., Yan, C., Richoz, S., Liu, X., Wang, L., 2015. Early Triassic conodonts of Jiarong, Nanpanjiang Basin, southern Guizhou Province, South China. *Journal of Asian Earth Sciences*, 105, 104-121.

Chen, Y., Richoz, S., Krystyn, L., Zhang, Z., 2019. Quantitative stratigraphic correlation of Tethyan conodonts across the Smithian-Spathian (Early Triassic) extinction event. *Earth-Science Reviews*.

Dagys, A.S. 1994. Lower Triassic stage, substage and zonal scheme of northeastern Asia. *Mémoires de Géologie* (Lausanne) 22: 15-24.

Galfetti, T., Bucher, H., Ovtcharova, M., Schaltegger, U., Brayard, A., Brühwiler T., Goudemand, N., Weissert H., Hochuli, P., Cordey, F., Guodon K., 2007. Timing of the Early Triassic carbon cycle perturbations inferred from new U-Pb ages and ammonoid biochronozones. *Earth and Planetary Science Letters* 258: 593-604.

Goudemand, N., Romano, C., Brayard, A., Hochuli, P.A.,, Bucher, H., 2013. Comment on "Lethally Hot Temperatures During the Early Triassic Greenhouse". *Science*. 339 (6123): 1033.

Guex, J., 1991. Biochronological Correlations. Springer Verlag.

Hammer, Ø., 2013. PAST: Paleontological Statistics Version 3.01.

Hammer, Ø., Jones, M.T., Schneebeli-Hermann, E., Bolvig Hansen, B., Bucher, H., 2019. Are Early Triassic extinction events associated with mercury anomalies? A reassessment of the Smithian-Spathian boundary extinction. *Earth Science Reviews* 195, 179-190. [doi.org/10.1016/j.earscirev.2019.04.016](https://doi.org/10.1016/j.earscirev.2019.04.016)

Jenks, F.J., Brayard, B., 2018. Smithian (Early Triassic) Ammonoids from Crittenden Springs. *New Mexico Museum of Natural History and Science Bulletin* 78.

Laishi, Z., Orchard, M. J., Jinnan, T., Zhiming, S., Jinxun, Z., Suxin, Z., Ailing, Y., 2007. Lower Triassic conodont sequence in Chaohu, Anhui Province, China and its global correlation. *Palaeogeography, Palaeoclimatology, Palaeoecology*, 252(1-2), 24-38.

Leu, M., Bucher, H., Goudemand, N., 2019. Clade-dependent size response of conodonts to environmental changes during the late Smithian extinction. *Earth Science Reviews*. 195, 52-67; doi.org/10.1016/j.earscirev.2018.11.003.

Komatsu, T., Takashima, R., Shigeta, Y., Maekawa, T., Tran, H.D., Cong, T.D., Sakata, S., Dinh, H.D., Takahashi, O., 2016. Carbon isotopic excursions and detailed ammonoid and conodont biostratigraphies around Smithian–Spathian boundary in the Bac Thuy Formation, Vietnam. *Palaeogeography, Palaeoclimatology, Palaeoecology*. 454, 65–74.

Lucas, S.G., 2018. The GSSP Method of Chronostratigraphy: A Critical Review. *Frontiers Earth Science*, 06 November 2018. [doi.org/10.3389/feart.2018.00191](https://doi.org/10.3389/feart.2018.00191)

Miller, K.G., Wright, J.D, 2017. Success and failure in Cenozoic global correlations using golden spikes: A geochemical and magnetostratigraphic perspective. *Episodes*. <http://dx.doi.org/10.18814/epiiugs/2017/v40i1/017003>

Orchard, M.J., Zonneveld, J.P., 2009. The lower Triassic Sulphur Mountain Formation in the Wapiti Lake area: lithostratigraphy, conodont biostratigraphy, and a new biozonation for the lower Olenekian (Smithian). *Canadian Journal of Earth Sciences* 46 (10), 757–790.

Romano, C., Goudemand, N., Vennemann, T.W., Ware, D., Schneebeli-Hermann, E., Hochuli, P. A., Brühwiler, T., Brinkmann, W., Bucher, H., 2013. Climatic and biotic upheavals following the end-Permian mass extinction. *Nature Geoscience* 6, 57–60. https://doi.org/10.1038/ngeo1667

Silberling, N. J., Tozer, E. T., 1968. Biostratigraphic classification of the marine Triassic in North America (Vol. 110). *Geological Society of America*.

Sun, Y.D., Joachimski, M.M., Wignall, P.B., Yan, C.B., Chen, Y.L., Jiang, H.S., Wang, L.N., Lai, X.L., 2012. Lethally hot temperatures during the Early Triassic Greenhouse. *Science* 338, 366–370.

Tozer, E. T., 1967. A standard for Triassic time. *Geological Survey Canada, Bulletin* 156, 1-103.

Tozer, E. T., 1982. Marine Triassic faunas of North America: their signiﬁcance for assessing plate and terrane movement. *Geologische Rundschau*, 71 (3), 1077–1104.

**2 Supplementary Figures and Tables**

**2.1. Supplementary Figures**

**Supplementary Figure S1 :**


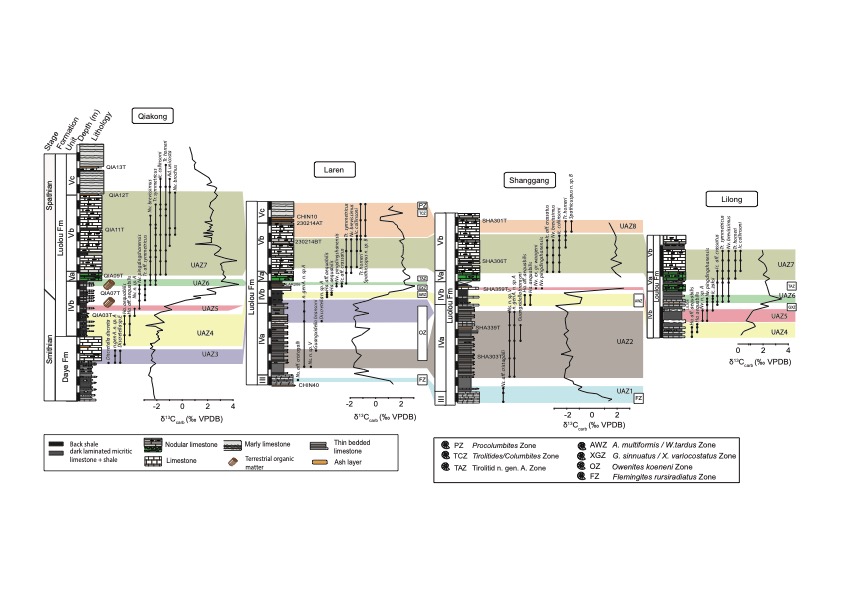


Biostratigraphic controls of the four studied sections and their respective carbon isotope records. The distribution of ammonoid zones is shown by labelled rectangles on the right side of each section. The detailed conodont occurrences allow the construction of 8 Unitary Associations whose lateral extensions are shown by color codes. Qiakong is the most expanded SSB section and Lilong is less expanded one. Note the different scale for Lilong.

**Supplementary Figure S2 :**

Sequences of unitary association (UAs), unitary associations zones (UAZs), lateral reproducibility and dissimilarity index (D) obtained from the biochronological analyses in the 4 studied sections from South China. Grey shades in the upper figure indicate poor lateral reproducibility and/or low dissimilarity index of the preliminary UA2, UA3, UA6, UA7, UA8, UA9, UA10, UA11 UA12 and UA13. These 14 UAs were merged into 8 laterally reproducible UAZs.

**Supplementary Figure S3 :**

A: Lithology and δ13Ccarb data of Qiakong section with position of organic matter samples; b: example of degraded phytoclasts from sample QIA 162. c: δ13Corg, HI and OI data, and palynofacies data stratigraphically aligned with Qiakong section (a). Palynofacies data show dominance of degraded phytoclasts troughout the section. TOC and δ13Corg, follow parallel trends unrelated to, palynofacies composition. Note that amorphous organic matter only occurs in the black shales of unit IVb. d: HI *vs* Tmax diagram: geochemical data characterize type II and III kerogen for organic matter from Qiakong section.

**Supplementary Figure S4 :**


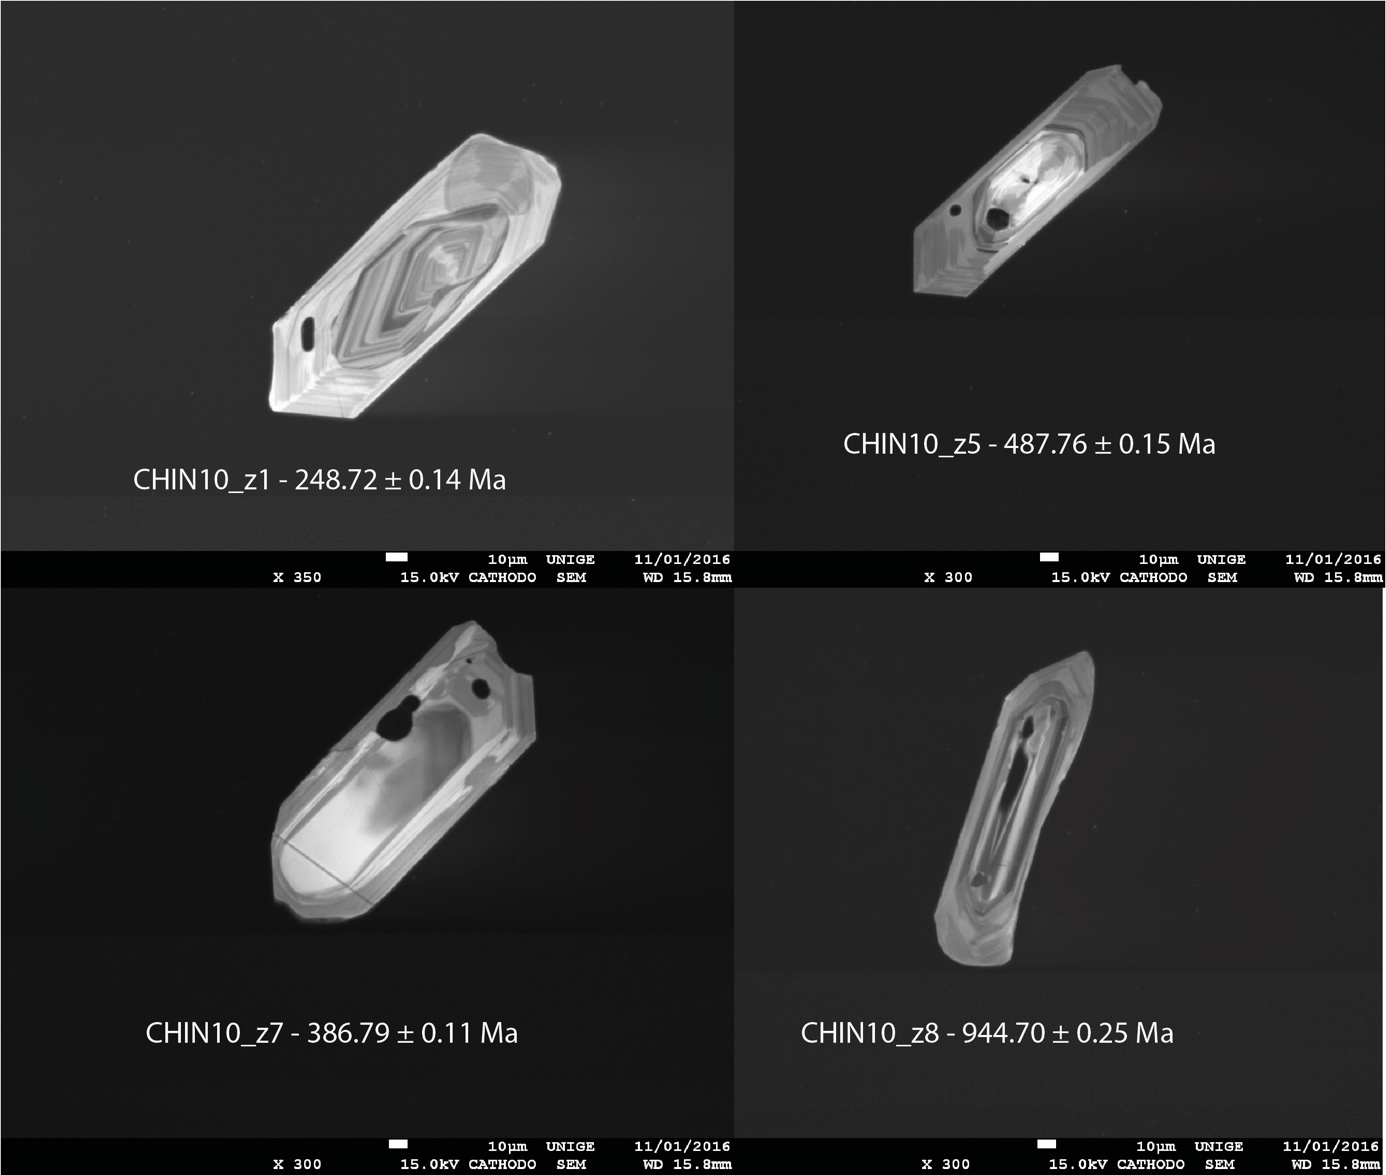


Examples of core-rim textures in different zircon crystals of CHIN10. Note that zircon z1 with an obvious core that has been truncated through a phase of resorption is part of the youngest cluster at 248.853 ± 0.086 Ma (Fig. 3 main text). The entire set of CL images may be obtained on request.

**2.2. Supplementary Tables**

(tables in separate files)

Supplementary Table S1: Results of U-Pb age determinations

Supplementary Table S2: Model output and calculation of the SSB, durations of carbon excursion, substage and hiatus, and detailed model parameters for each age depth model of each section.

Supplementary Table S3: Results of carbon and oxygen isotope analyses

Supplementary Table S4: Results of palynofacies analysis.

Supplementary Table S5: Comparison between the different strategies for age definition of ash beds.
